# Supplementary material for: Polygenic risk of any, metastatic, and fatal prostate cancer in the Million Veteran Program
Source: bioRxiv or medRxiv preprint supplement (doi:10.1101/2021.09.24.21264093), 2022-04-15
Supplement: Supplementary file [file media-1.pdf]

## Supplementary Material:

| Endpoint        | African          | African p          | Hispanic         | Hispanic p        | Asian            | Asian p           | European |
|-----------------|------------------|--------------------|------------------|-------------------|------------------|-------------------|----------|
| Prostate Cancer | 2.43 [2.38-2.48] | <10 <sup>-16</sup> | 1.04 [1.0-1.08]  | 0.05              | 0.86 [0.76-0.95] | <10 <sup>-2</sup> | Ref      |
| Metastatic      | 3.01 [2.83-3.18] | <10 <sup>-16</sup> | 1.27 [1.13-1.41] | <10 <sup>-4</sup> | 1.02 [0.7-1.37]  | 0.88              | Ref      |
| Fatal           | 2.65 [2.37-2.96] | <10 <sup>-16</sup> | 1.15 [0.9-1.42]  | 0.24              | 0.58 [0.17-1.08] | 0.15              | Ref      |

**Supplementary Table 1: Association of ancestry with three prostate cancer clinical endpoints.** Hazard ratios (HRs) are shown from Cox-proportional hazards models with ancestry group as the only predictor variable. Numbers in brackets are 95% confidence intervals.

| Endpoint        | p Value     | FH               |
|-----------------|-------------|------------------|
| Prostate Cancer | $<10^{-16}$ | 2.06 [2.0-2.12]  |
| Metastatic      | $<10^{-16}$ | 1.67 [1.5-1.83]  |
| Fatal           | $<10^{-11}$ | 1.84 [1.54-2.17] |

**Supplementary Table 2: Association of family history with three prostate cancer clinical endpoints.** Hazard ratios (HRs) are shown from Cox-proportional hazards models with family history as the only predictor variable. This analysis was limited to the 374,455 participants who provided family history information in baseline survey data. Numbers in brackets are 95% confidence intervals.

**A.**

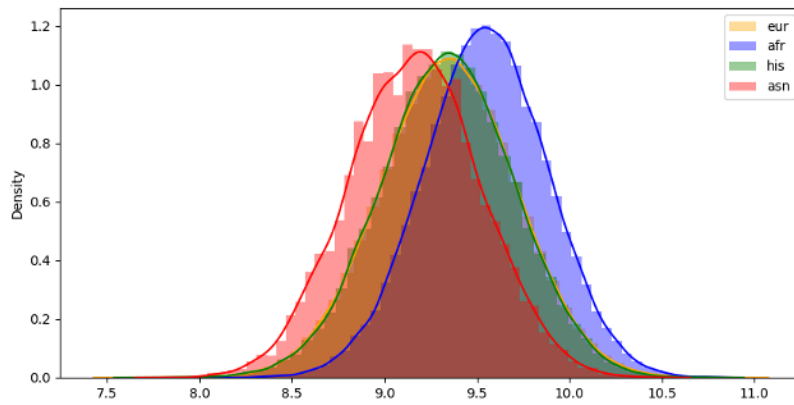

**B.**

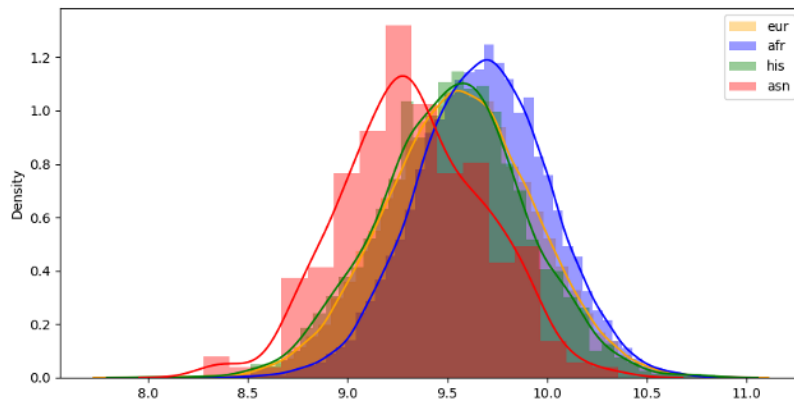

**Supplementary Figure 1. (A)** PHS290 score density plot in prostate cancer controls for European, African, Hispanic and Asian ancestry groups. **(B)** PHS290 score density plot in prostate cancer cases for European, African, Hispanic and Asian ancestry groups. These plots do not account for age.
